# Supplementary material for: Redox-sensitive prodrug nanoassemblies based on linoleic acid-modified docetaxel to resist breast cancers
Source: PubMed Central journal article supplement — Acta Pharm Sin B. 2018 Aug 31;9(2):421–32. doi: 10.1016/j.apsb.2018.08.008 (PMC6437471; doi:10.1016/j.apsb.2018.08.008), 2018-08-31
Supplement: mmc1.pdf [file mmc1.pdf]

## Supplementary Information

### Original article

## Redox sensitive prodrug nanoassemblies based on linoleic acid-modified docetaxel to resist breast cancers

Meng Li<sup>a</sup>, Liwen Zhao<sup>a</sup>, Tao Zhang<sup>a</sup>, Yue Shu<sup>a</sup>, Zhonggui He<sup>a</sup>, Yan Ma<sup>c</sup>, Dan Liu<sup>\*\*b</sup>, Yongjun Wang<sup>\*a</sup>

<sup>a</sup>*Wuya College of Innovation, Shenyang Pharmaceutical University, Shenyang 110016, China*

<sup>b</sup>*Key Laboratory of Structure-Based Drug Design and Discovery, Ministry of Education, Shenyang Pharmaceutical University, Shenyang 110016, China*

<sup>c</sup>*School of Chinese Materia Medica, Guangzhou University of Chinese Medicine, Guangzhou 510405, China*

Received 21 May 2018; received in revised form 12 July 2018; accepted 30 July 2018

\*Corresponding author. Tel./fax: +86 24 23986325.

E-mail address: [wangyongjun@sypu.edu.cn](mailto:wangyongjun@sypu.edu.cn) (Yongjun Wang).

\*\*Corresponding author. Tel./fax: +86 24-4352-0218.

E-mail address: sammyld@163.com (Dan Liu).

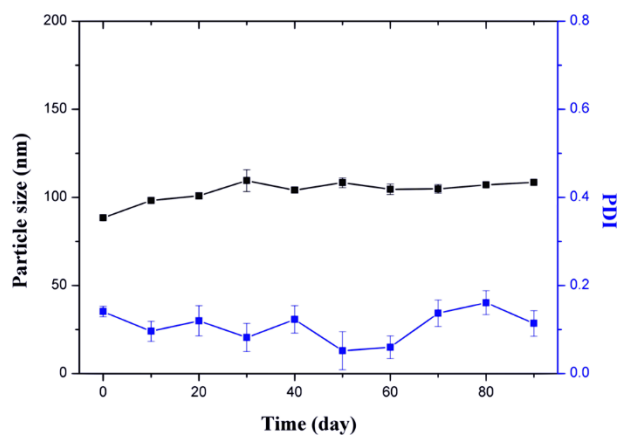

**Figure S1** The long-term stability of non-PEGylated nanoassemblies at 4 °C for three months.
